# Supplementary material for: Involvement of Angiopoietin‐2 and Tie2 Receptor Phosphorylation in STEC‐HUS Mediated by Escherichia coli O104:H4
Source: Hindawi journal article supplement (doi:10.1155/2015/670248), 2015-01-01
Supplement: f1 [file 670248.f1.pdf]

## Figures

Supplementary Figure 1

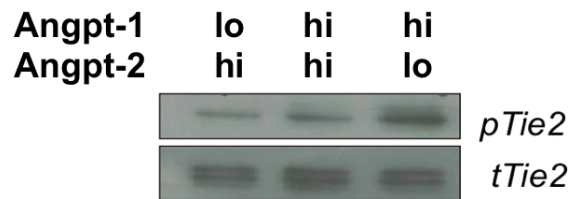

## Figure Legends

Supplementary Figure 1:

Exemplary blot from HUVEC lysates stimulated plasma with from our patients (lo = low Angpt-1/-2 concentration, hi = high Angpt-1/-2 concentration). The patient with high Angpt-2 and low Angpt-1 (left lane) shows a weak pTie2 / tTie2 response in comparison with the patient with the more physiological balance, i.e. low Angpt-2 and high Angpt-1 (right lane).
